# Supplementary material for: Mechanical splitting of microtubules into protofilament bundles by surface-bound kinesin-1
Source: PubMed Central journal article supplement (PMC5175155; doi:10.1038/srep39408), 2016-12-21
Supplement: srep39408-s5.pdf [file srep39408-s5.pdf]

# Mechanical splitting of microtubules into protofilament bundles by surface-bound kinesin-1

Virginia VanDelinder, Peter Adams, George D. Bachand

## SUPPLEMENTARY INFORMATION

### Supplementary Figure 1

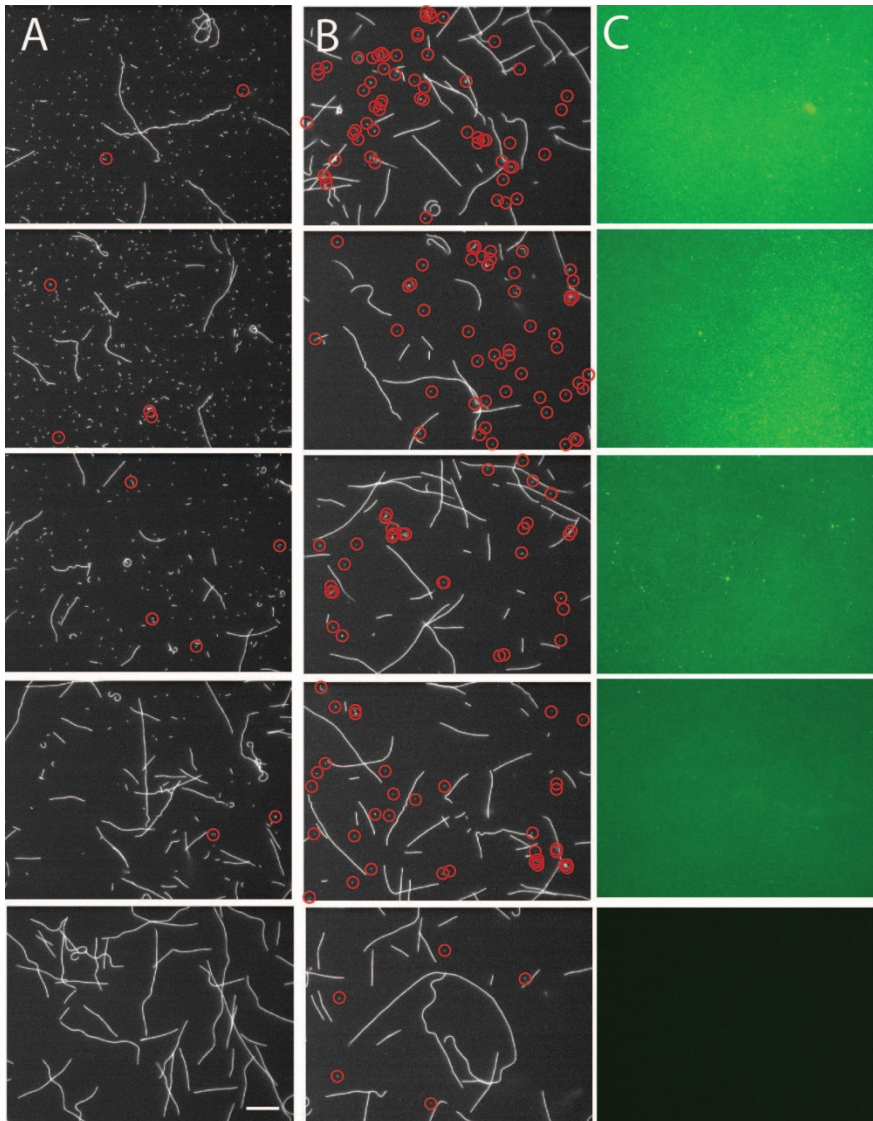

**Figure S1.** Fluorescence images with fragments circled in red for full-length kinesin (A) and GFP-kinesin (B) both with a TRITC-labelled MTs and a TRITC filter set, and (C) GFP-kinesin and a GFP filter set at the following concentrations from top to bottom: 16500, 8260, 4130, 1650, 165  $\mu\text{m}^{-2}$ . The circled fragments were determined in the movies that the fluorescent images in (A) and (B) were taken from. Scale bar is 10  $\mu\text{m}$ .

Supplementary Figure 2

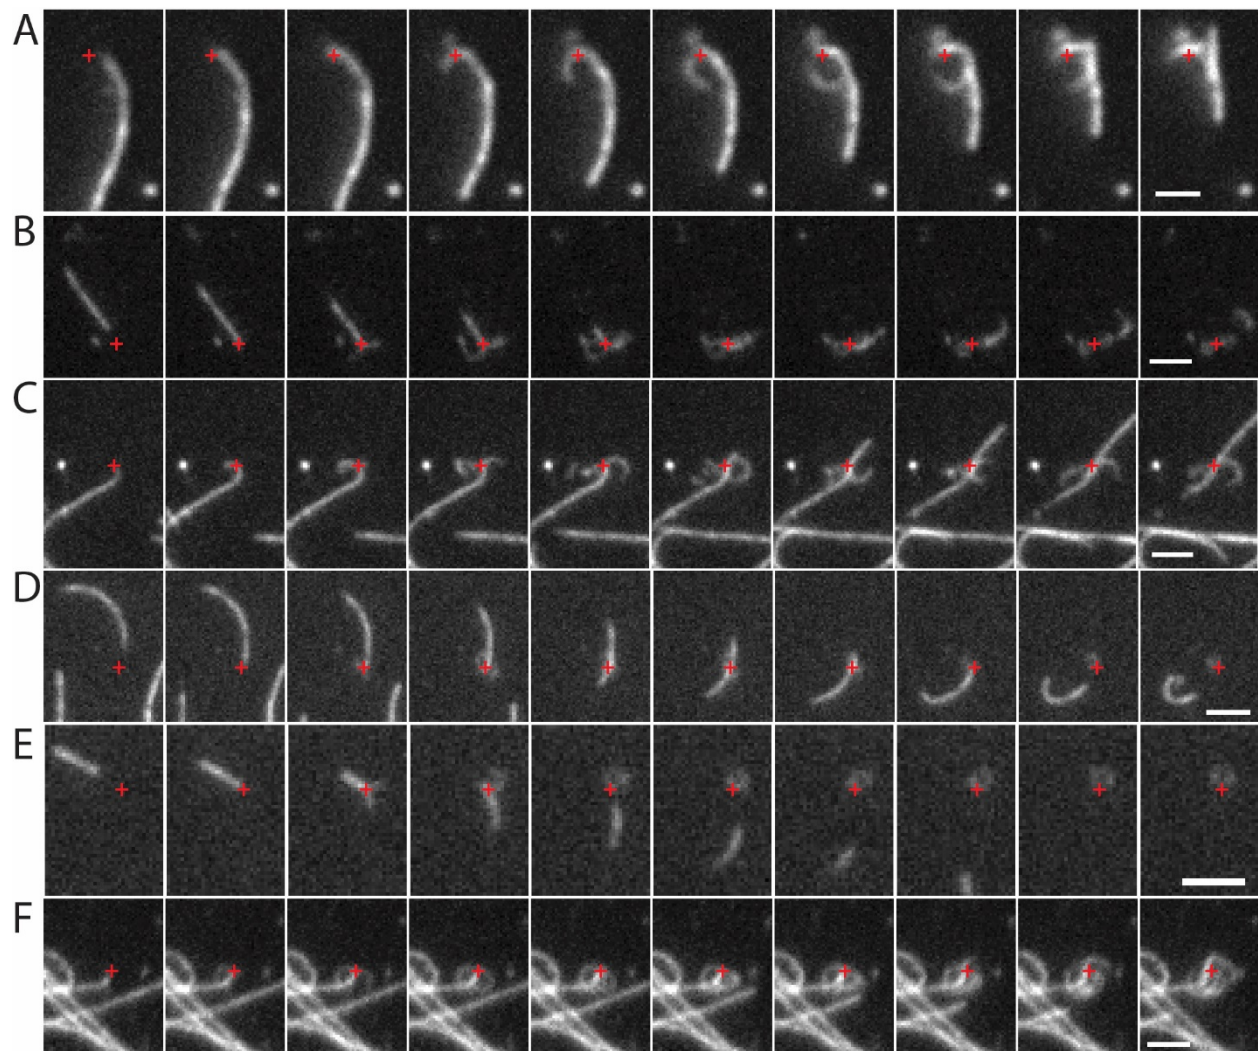

**Figure S2.** (A-F) Image sequences of PFB formation. Images are every 2 s. Point where splitting occurs is marked with a red “+”, which is in the same location in each frame. Scale bars are 2  $\mu\text{m}$ .

**Supplementary Figure 3**

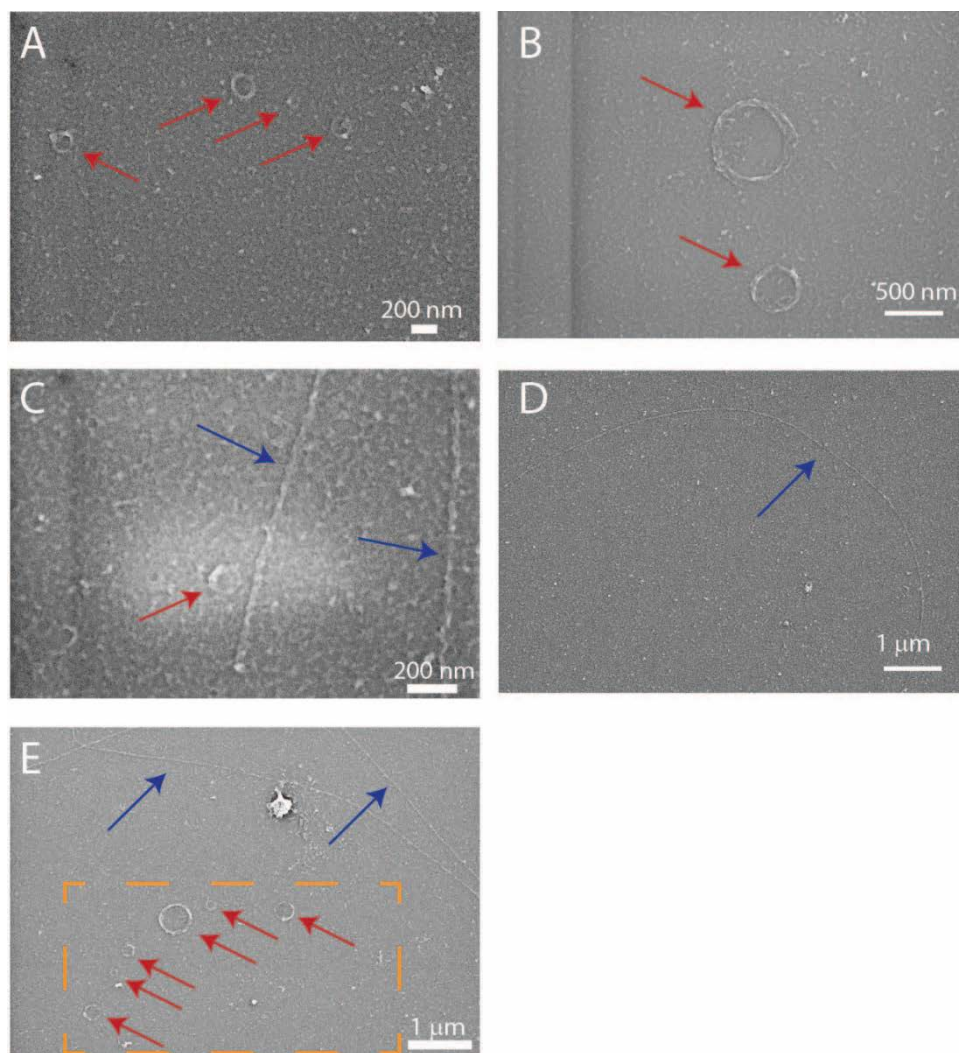

**Figure S3.** SEM images of MTs and fragments (highlighted by blue and red arrows, respectively). The dashed box in (E) is the region shown in Figure 2B.

### Supplementary Figure 4

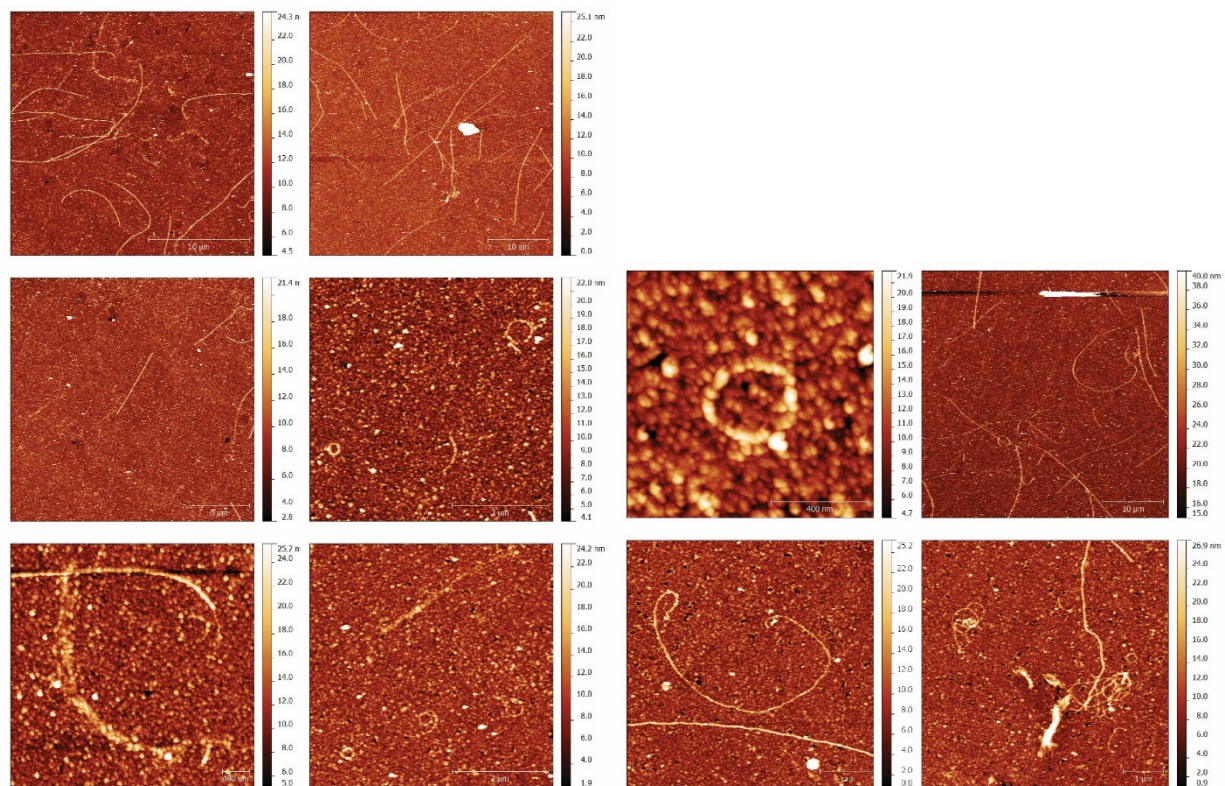

**Figure S4.** AFM images of MTs and PFBS.

### Supplementary Figure 5

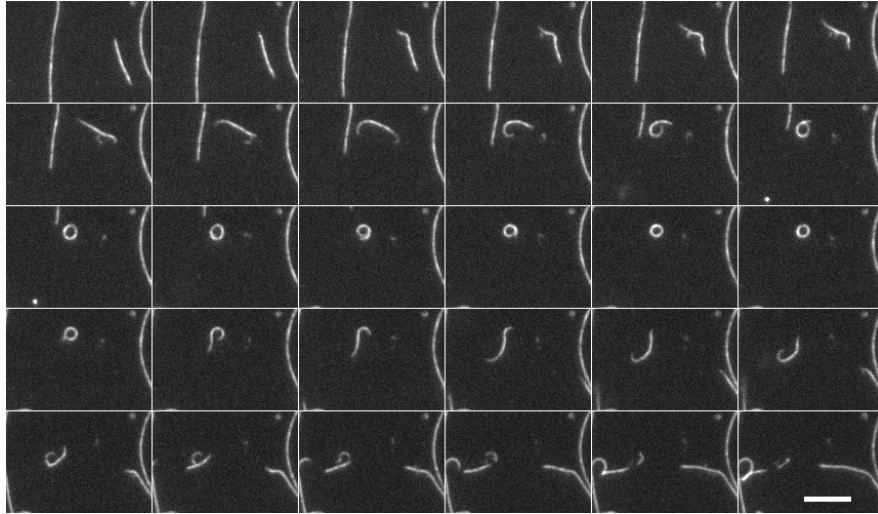

**Figure S5.** Fluorescence images of MT that had a fragment split off of the leading end in the 4<sup>th</sup> frame. The curved fragment that remains attached causes the MT to follow a circular trajectory. When the fragment breaks off the MT tip, the MT again travels in a normal, straight manner. Scale bar is 5  $\mu\text{m}$ ; 2 s between each frame.

Supplementary Figure 6

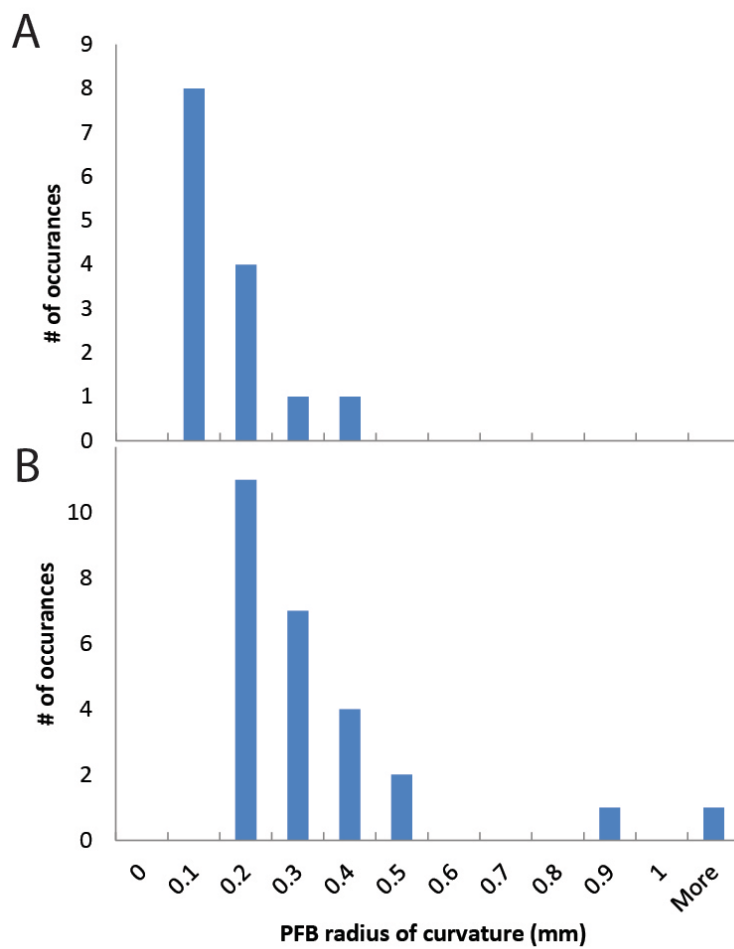

Figure S6. Histograms of radius of curvature of PFBs as measured with SEM (A) and AFM (B).

**Supplementary Figure 7**

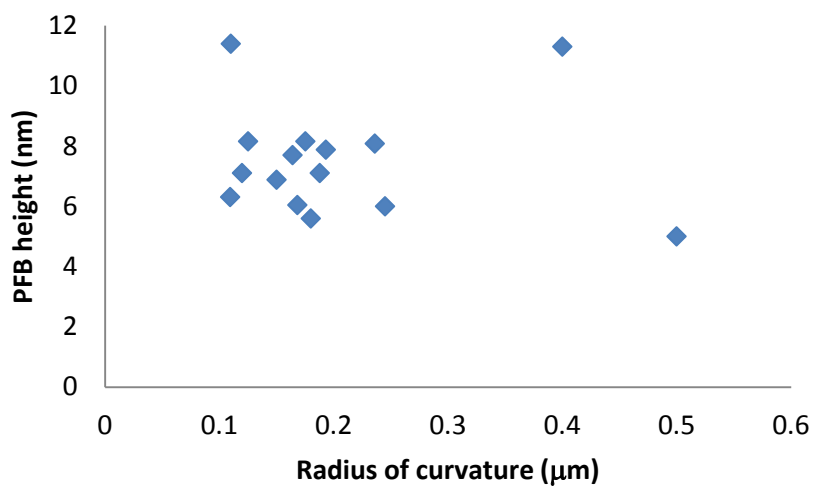

**Figure S7.** Plot of PFB height as measured with AFM versus PFB radius of curvature. No correlation between height and curvature was observed.

### Supplementary Figure 8

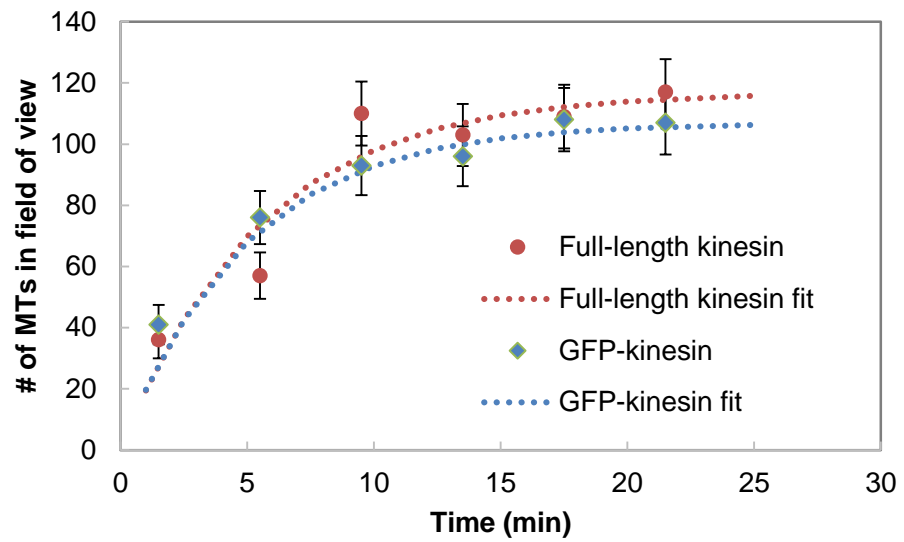

**Figure S8.** MT landing rates and fits for GFP-kinesin and full-length kinesin, both introduced to a flow cell at 0.36  $\mu\text{M}$  concentration. Detailed description of the procedure for these measurements is provided in the Methods section of the paper.



## Supplementary Figure 9

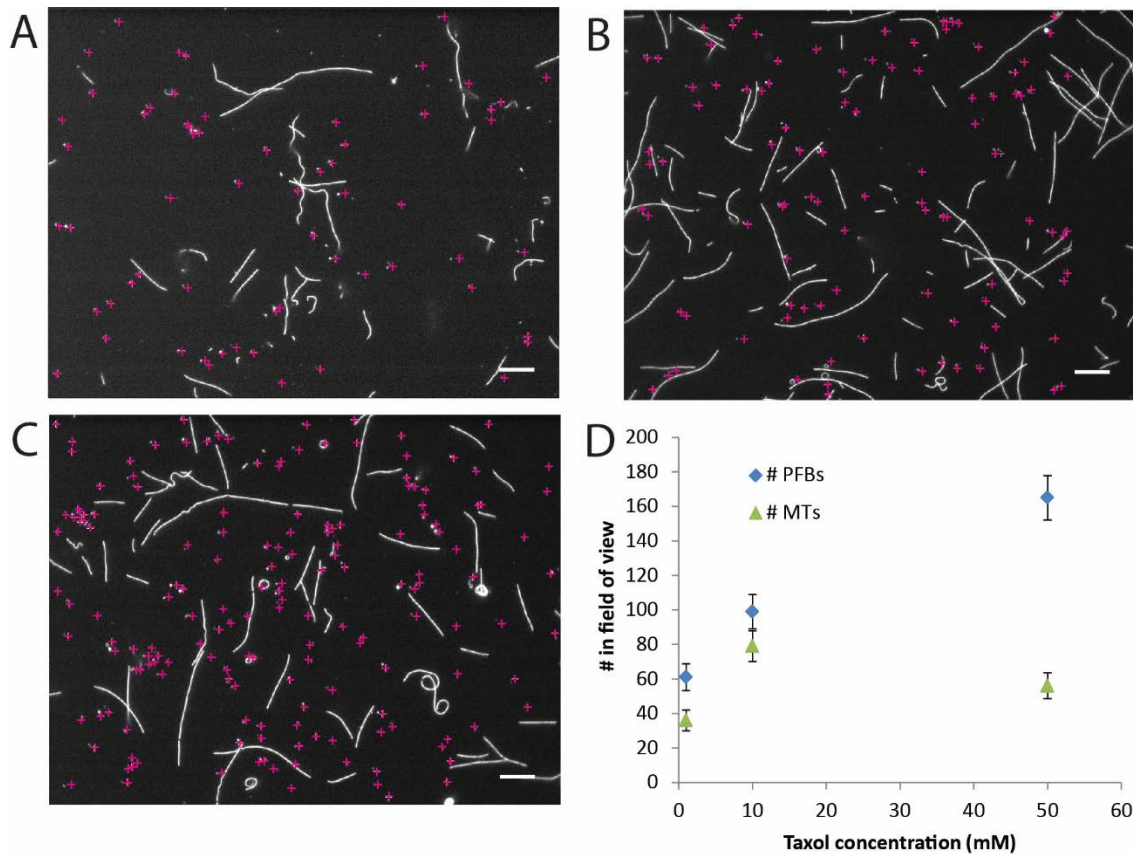

**Figure S9.** Fluorescence micrographs of experiments performed at 3 different paclitaxel concentrations of 1, 10, and 50  $\mu\text{M}$  shown in (A), (B), and (C), respectively. PFBs are marked with magenta crosses. The surface density of GFP-kinesin in these experiments was  $16500 \mu\text{m}^{-2}$ . Each assay was imaged 30 minutes after the final wash with motility solution. The same concentration of MTs was used in each experiment. The number of PFBs present is a function of the rate of PFB formation and the rate of PFB decay. Increased stability of PFBs is shown by having a higher concentration of PFBs present at 30 min with higher paclitaxel concentration. Scale bar is 10  $\mu\text{m}$ . (D) Plot of number of PFBs and MTs in a field of view. Error bars are standard deviation.

**Supplementary Figure 10**

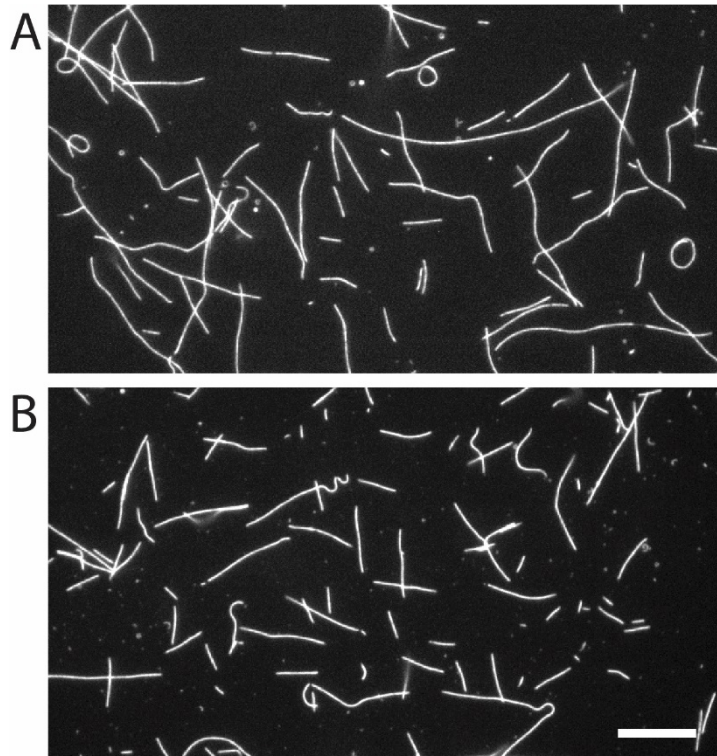

**Figure S10.** Fluorescence micrographs of experiments performed at with 20% and 50% TRITC-labelled tubulin MTs shown in (A) and (B), respectively. The surface density of GFP-kinesin in these experiments was  $16500 \mu\text{m}^{-2}$ . Each assay was imaged 30 minutes after the final wash with motility solution. Scale bar is  $10 \mu\text{m}$ .

**Supplementary Figure 11**

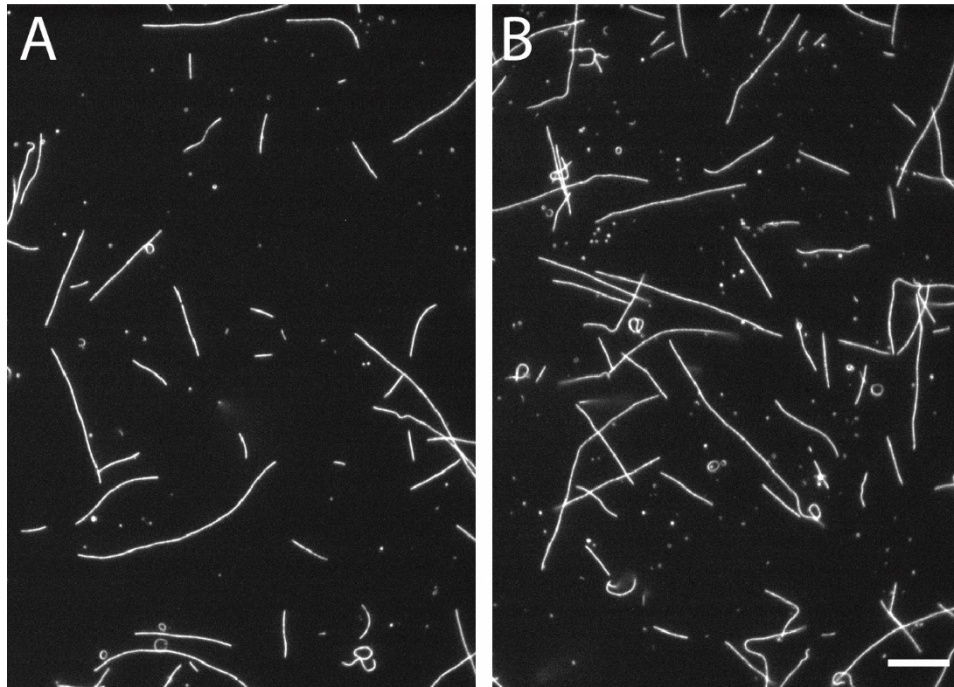

**Figure S11.** Fluorescence micrographs of experiments performed at with GTP of GMP-CPP in the MTs polymerization buffer shown in (A) and (B), respectively. The surface density of GFP-kinesin in these experiments was  $16500 \mu\text{m}^{-2}$ . Each assay was imaged 30 minutes after the final wash with motility solution. The number of PFBs present is a function of the rate of PFB formation and the rate of PFB decay. Increased stability of PFBs is shown by having a higher concentration of PFBs present at 30 min for the GMP-CPP MTs. Scale bar is  $10 \mu\text{m}$ .

### **Captions of Movies**

**Movie S1.** Fluorescence movie of gliding assay of MTs transported by surface-bound GFP-kinesin showing MTs being split laterally into protofilament bundles.

**Movie S2.** Fluorescence movie showing the two MTs tips splitting into 2 fragments. The fragments have high curvature and are mobile.

**Movie S3.** Fluorescence movie of a fragment being pulled off of the side of a MT. Green arrow in first frame points to location of splitting event.

**Movie S4.** Fluorescence movie of a MT being led in a circular trajectory by a curved PFB at the leading end.
